# Supplementary material for: Cemiplimab for Locally Advanced and Metastatic Cutaneous Squamous-Cell Carcinomas: Real-Life Experience from the French CAREPI Study Group
Source: MDPI journal article supplement (doi:10.3390/cancers13143547), 2021-07-15
Supplement: s1 [file s1]

Figure S1

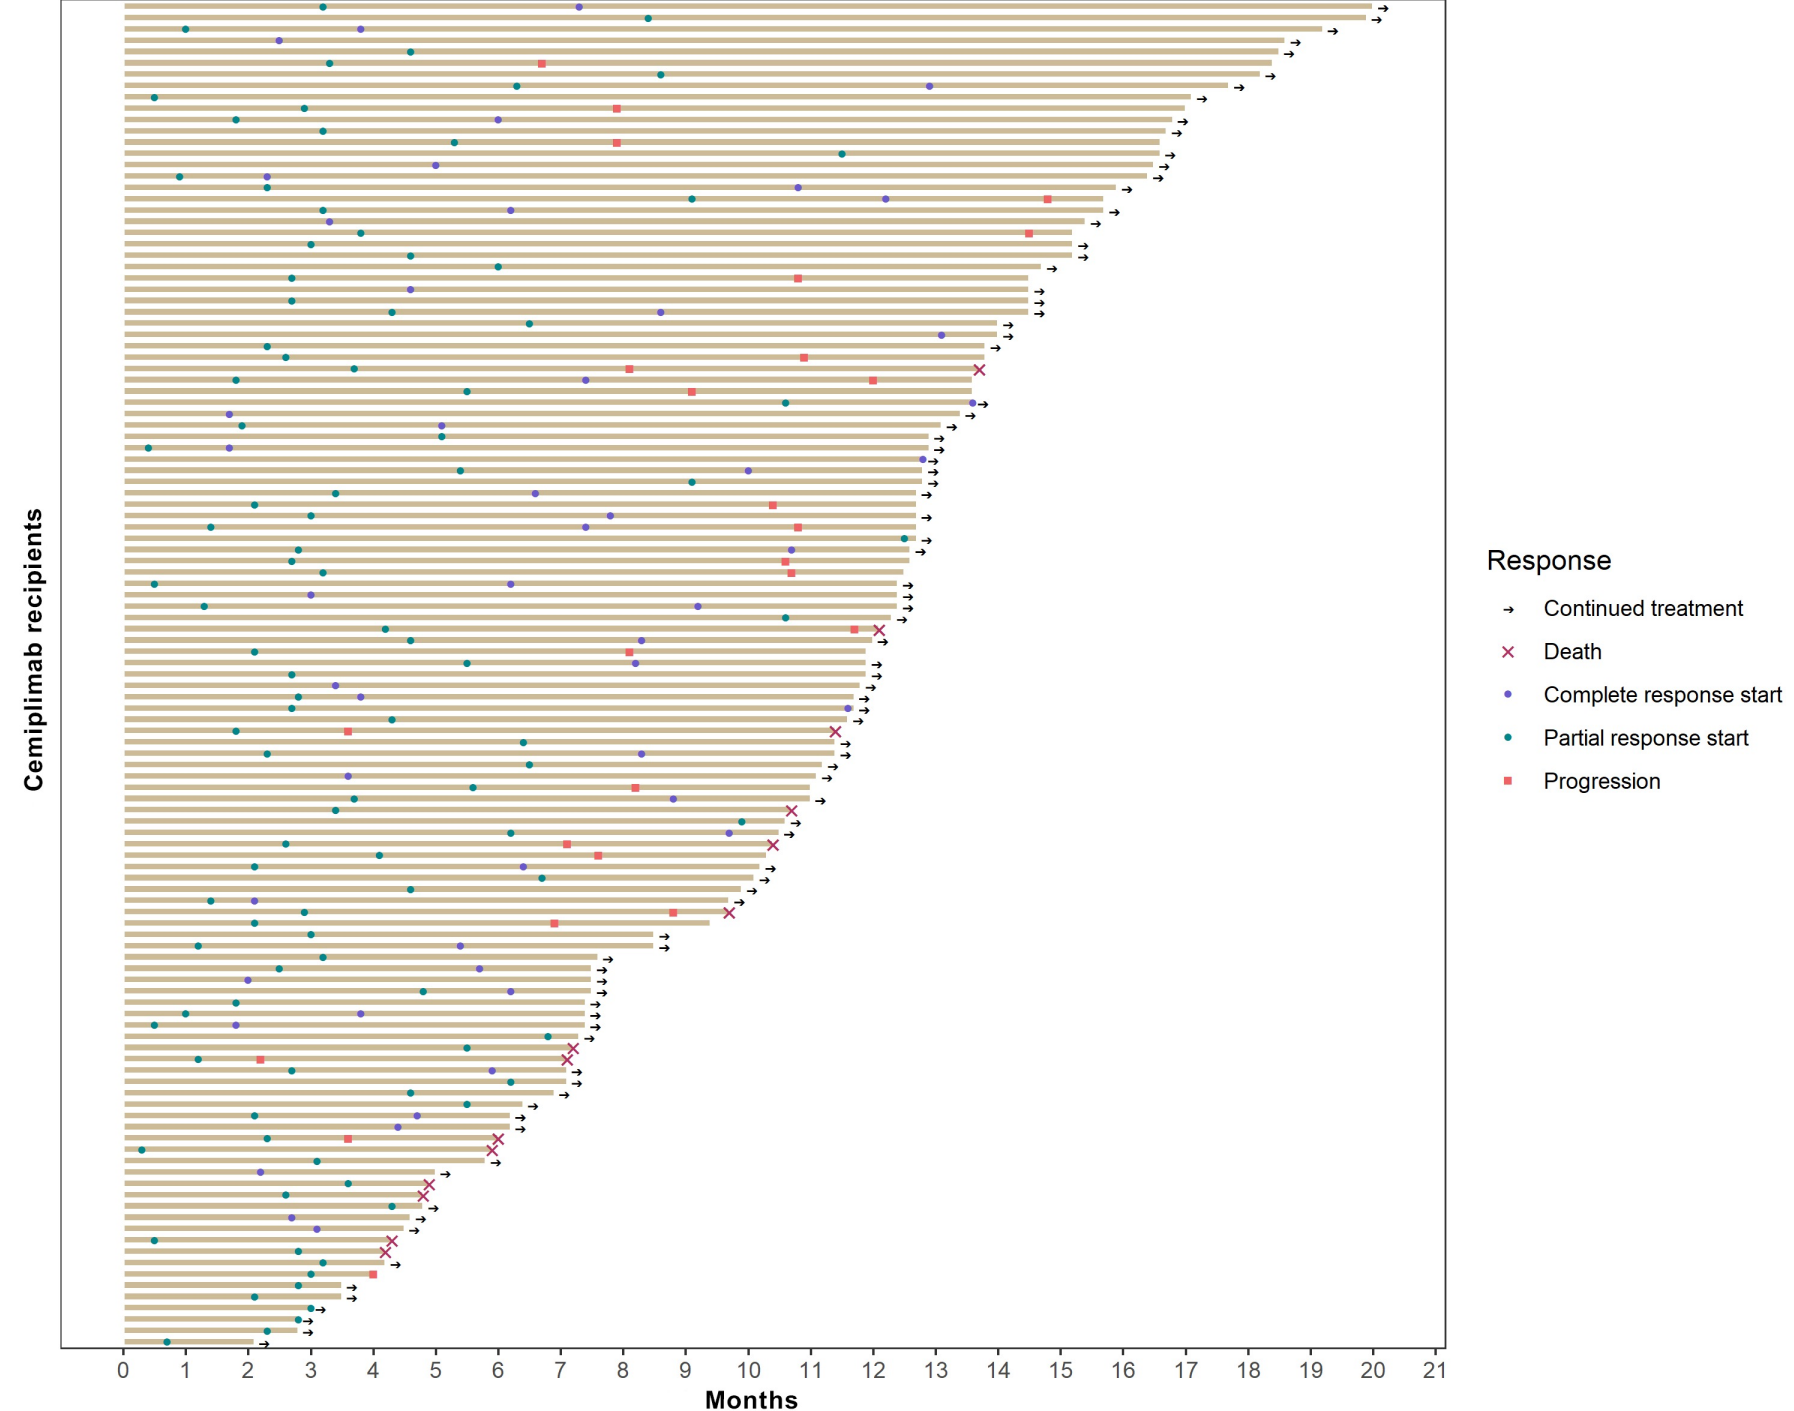

Table S1: Therapies given to the 245 intent-to-treat patients before cemiplimab

| Prior Treatments                                      | Value    |
|-------------------------------------------------------|----------|
| Radiotherapy                                          | 144 (60) |
| Surgery                                               | 193 (79) |
| Previous systemic treatment                           | 121 (49) |
| Pre-cemiplimab line(s) of systemic treatment(s)/121   |          |
| 1                                                     | 93 (77)  |
| 2                                                     | 19 (16)  |
| 3                                                     | 8 (7)    |
| 4                                                     | 1 (0.8)  |
| Median duration of systemic treatment, months (range) | 4 (0–65) |
| Systemic treatments administered/121                  |          |
| Single chemotherapy                                   | 9 (7)    |
| Combined chemotherapies                               | 29 (24)  |
| Chemotherapy plus radiotherapy                        | 15 (12)  |
| Anti-EGFR antibody                                    | 31 (26)  |
| Anti-EGFR antibody plus radiotherapy                  | 9 (7)    |
| Anti-EGFR antibody plus chemotherapy                  | 46 (38)  |
| Anti PD-1                                             | 5 (4)    |
| Others <sup>a</sup>                                   | 7 (6)    |

Results are expressed as number (%), unless stated otherwise.

EGFR, epidermal growth factor receptor; PD-1, programmed cell-death protein-1

<sup>a</sup> Other treatments included: intratumoral bleomycin, 2; 1 each: combination chemotherapy, anti-EGFR and radiotherapy, anti-EGFR and imiquimod, vismodegib, paclitaxel and interferon followed by sorafenib, or unknown.
